# Supplementary material for: Bioremediation of nitrate and Fe(ii) combined contamination in groundwater by heterotrophic denitrifying bacteria and microbial community analysis
Source: Royal Society of Chemistry journal article supplement (doi:10.1039/c6ra22687f), 2016-01-01
Supplement: c6ra22687f1.pdf [file c6ra22687f1.pdf]

Table S1 Experimental condition designed by BBD and the values of two responses for the study

| Run no. | Temperature (°C) | C/N  | pH | Final NO <sub>3</sub> <sup>-</sup> -N concentration<br>(mg L <sup>-1</sup> ) | Fe (II) oxidizing rate<br>(mg Fe <sup>2+</sup> L <sup>-1</sup> ) |
|---------|------------------|------|----|------------------------------------------------------------------------------|------------------------------------------------------------------|
| Run 1   | 25               | 1    | 12 | 46.0                                                                         | 0.9                                                              |
| Run 2   | 25               | 1.75 | 8  | 0                                                                            | 5.2                                                              |
| Run 3   | 25               | 1.75 | 8  | 0                                                                            | 5.0                                                              |
| Run 4   | 25               | 2.50 | 12 | 45.7                                                                         | 1.1                                                              |
| Run 5   | 35               | 1.75 | 4  | 0                                                                            | 5.0                                                              |
| Run 6   | 15               | 2.50 | 8  | 0.084                                                                        | 4.4                                                              |
| Run 7   | 35               | 1    | 8  | 0                                                                            | 3.8                                                              |
| Run 8   | 25               | 2.50 | 4  | 35.0                                                                         | 4.2                                                              |
| Run 9   | 15               | 1.75 | 4  | 38.9                                                                         | 3.7                                                              |
| Run 10  | 25               | 1    | 4  | 43.0                                                                         | 3.0                                                              |
| Run 11  | 15               | 1.75 | 12 | 43.0                                                                         | 1.2                                                              |
| Run 12  | 35               | 1.75 | 12 | 42.4                                                                         | 1.1                                                              |
| Run 13  | 35               | 2.50 | 8  | 0                                                                            | 5.7                                                              |
| Run 14  | 15               | 1    | 8  | 23.9                                                                         | 3.5                                                              |

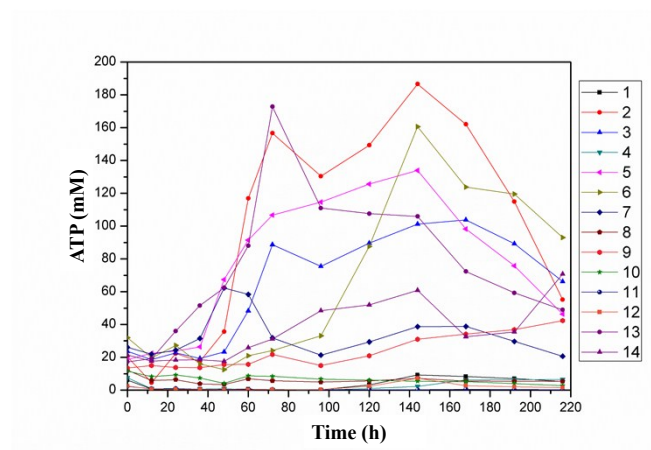

Figure S1 ATP concentration during the experiment for all Runs. ATP represent the activity and abundance of microbes.

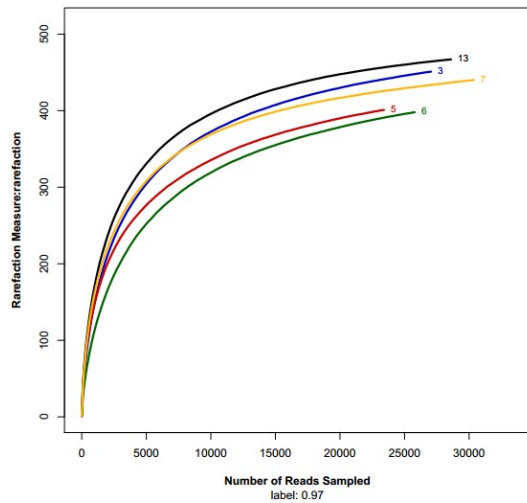

Figure S2 Rarefaction curves for five samples with low final  $\text{NO}_3\text{-N}$  concentration and high Fe(II) oxidizing rate.

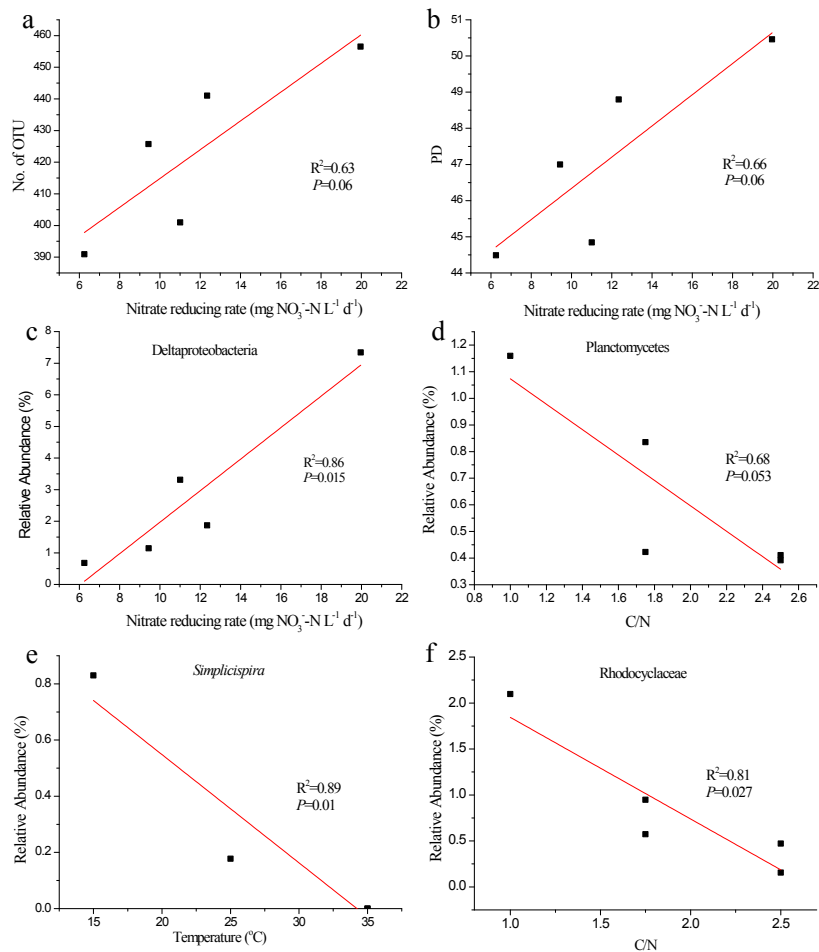

Figure S3 Linear correlations between (a) PD and nitrate-N reducing rate; (b) no. of OTU and nitrate-N reducing rate; (c) relative abundance of Deltaproteobacteria and nitrate-N reducing rate; (d) relative abundance of Planctomycetes and C/N ratio; (e) relative abundance of *Simplicispira* and temperature; (f) relative abundance of Rhodocyclaceae and C/N ratio.

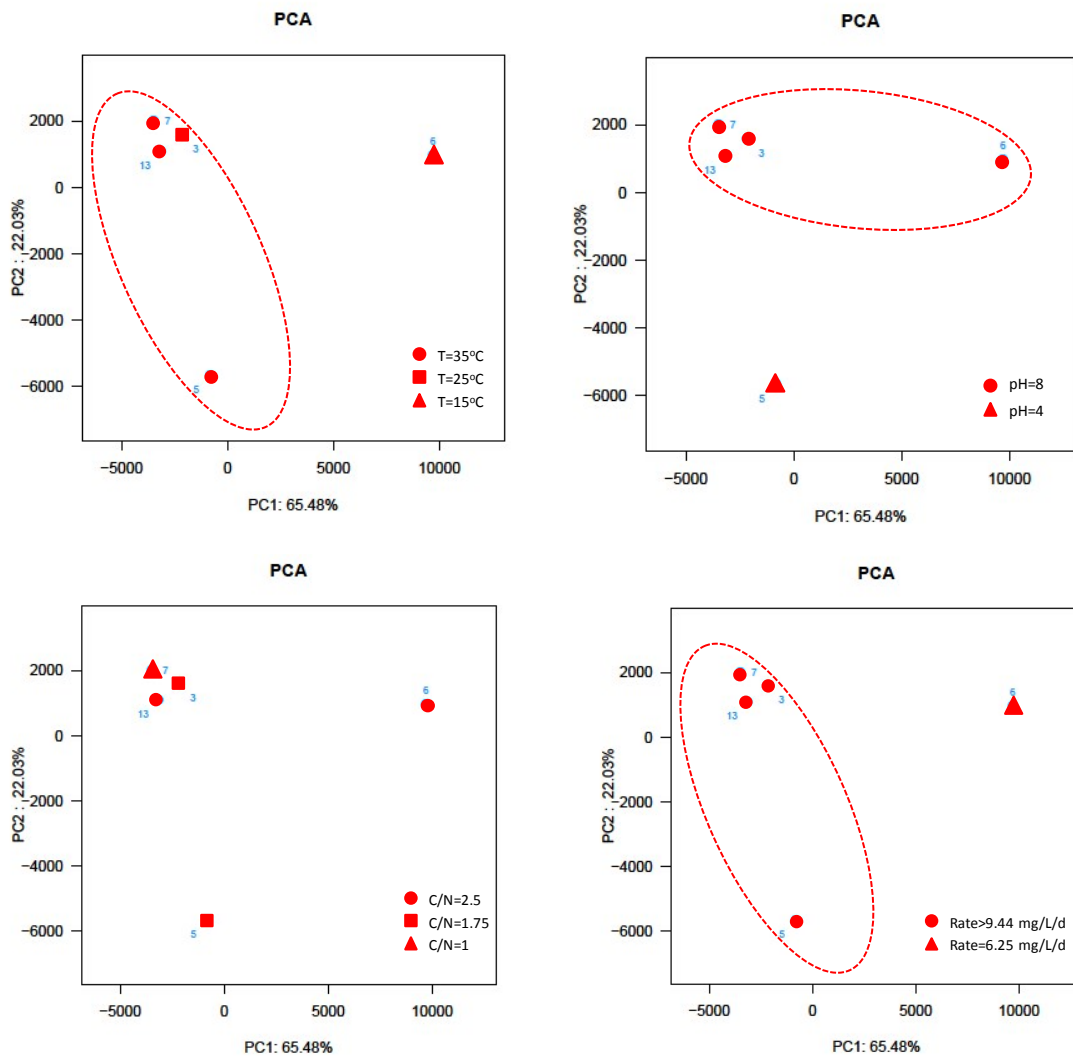

Figure S4 PCA analysis of microbial communities of five runs in BBD experiment. Samples that cluster close together share a greater similarity in composition.
